# Supplementary material for: The Post-Apoptotic Fate of RNAs Identified Through High-Throughput Sequencing of Human Hair
Source: PLoS One. 2011 Nov 16;6(11):e27603. doi: 10.1371/journal.pone.0027603 (PMC3218001; doi:10.1371/journal.pone.0027603)
Supplement: Table S5 — Annotated reads with >10 reads. (XLS) [file pone.0027603.s005.xls]

## Sheet: Sheet1
Genes used as set
1	A2LD1
2	A2ML1
3	A4GALT
4	AAA1
5	AAK1
6	AARS2
7	AASS
8	AATF
9	AATK
10	ABCA1
11	ABCA12
12	ABCA13
13	ABCA2
14	ABCA9
15	ABCB8
16	ABCB9
17	ABCC1
18	ABCC10
19	ABCC2
20	ABCC3
21	ABCC4
22	ABCC5
23	ABCD3
24	ABCF1
25	ABCF3
26	ABCG2
27	ABHD14B
28	ABHD15
29	ABHD2
30	ABHD4
31	ABHD5
32	ABHD6
33	ABI1
34	ABI3
35	ABL1
36	ABL2
37	ABLIM1
38	ABLIM2
39	ABP1
40	ABR
41	ABRA
42	ABTB2
43	ACAA2
44	ACACA
45	ACACB
46	ACAD10
47	ACAD9
48	ACADS
49	ACADVL
50	ACAN
51	ACBD3
52	ACBD4
53	ACBD5
54	ACCN1
55	ACCN4
56	ACCS
57	ACER2
58	ACHE
59	ACIN1
60	ACO2
61	ACOT1
62	ACOT11
63	ACOT2
64	ACOT7
65	ACOX1
66	ACOXL
67	ACP1
68	ACSF2
69	ACSL1
70	ACSL5
71	ACSM1
72	ACSM2A
73	ACSM2B
74	ACSM4
75	ACSS1
76	ACSS2
77	ACTA1
78	ACTB
79	ACTBL2
80	ACTC1
81	ACTG1
82	ACTN1
83	ACTN2
84	ACTN4
85	ACTR1B
86	ACTR3B
87	ACTR5
88	ACVR1B
89	ACVR1C
90	ACVR2B
91	ACVRL1
92	ADA
93	ADAM10
94	ADAM11
95	ADAM12
96	ADAM19
97	ADAM21
98	ADAM21P1
99	ADAM22
100	ADAM8
101	ADAMTS1
102	ADAMTS10
103	ADAMTS12
104	ADAMTS18
105	ADAMTS2
106	ADAMTS3
107	ADAMTS4
108	ADAMTS7
109	ADAMTS8
110	ADAMTS9
111	ADAMTSL1
112	ADAMTSL3
113	ADAMTSL4
114	ADAP1
115	ADAR
116	ADARB1
117	ADAT3
118	ADCY1
119	ADCY2
120	ADCY5
121	ADCY6
122	ADCY7
123	ADCY8
124	ADCY9
125	ADD1
126	ADH1B
127	ADH5
128	ADIPOR1
129	ADIPOR2
130	ADM2
131	ADO
132	ADORA1
133	ADPRH
134	ADPRHL2
135	ADRA1A
136	ADRA1B
137	ADRA1D
138	ADRA2A
139	ADRA2B
140	ADRA2C
141	ADRB1
142	ADRB2
143	ADRB3
144	ADRBK1
145	ADRBK2
146	ADRM1
147	ADSSL1
148	AEBP1
149	AEN
150	AFAP1L1
151	AFAP1L2
152	AFF1
153	AFF3
154	AFG3L2
155	AGA
156	AGAP1
157	AGAP11
158	AGAP2
159	AGAP3
160	AGAP6
161	AGBL1
162	AGBL2
163	AGFG1
164	AGGF1
165	AGK
166	AGMAT
167	AGPAT3
168	AGPAT4
169	AGPAT5
170	AGPAT6
171	AGPHD1
172	AGRN
173	AGT
174	AGTRAP
175	AGXT
176	AGXT2L1
177	AHDC1
178	AHNAK
179	AHNAK2
180	AHR
181	AHRR
182	AHSA2
183	AIDA
184	AIF1L
185	AIFM3
186	AIM1
187	AJAP1
188	AK2
189	AKAP1
190	AKAP12
191	AKAP13
192	AKAP2
193	AKAP6
194	AKIRIN2
195	AKNA
196	AKR1CL1
197	AKT1
198	AKT2
199	ALAD
200	ALAS1
201	ALDH18A1
202	ALDH2
203	ALDH3A2
204	ALDH3B2
205	ALDH4A1
206	ALDH6A1
207	ALG3
208	ALG9
209	ALKBH3
210	ALKBH5
211	ALMS1
212	ALOX12
213	ALOX12P2
214	ALPK3
215	ALPL
216	ALPP
217	ALS2
218	ALS2CL
219	ALS2CR12
220	AMAC1L2
221	AMD1
222	AMFR
223	AMH
224	AMICA1
225	AMIGO1
226	AMIGO3
227	AMMECR1L
228	AMOT
229	AMOTL1
230	AMY1A
231	AMY1B
232	AMY1C
233	AMZ1
234	AMZ2
235	ANAPC1
236	ANAPC2
237	ANG
238	ANGPTL6
239	ANK1
240	ANK3
241	ANKFY1
242	ANKH
243	ANKHD1
244	ANKHD1-EIF4EBP3
245	ANKLE1
246	ANKRD11
247	ANKRD12
248	ANKRD13A
249	ANKRD13D
250	ANKRD17
251	ANKRD19
252	ANKRD20A2
253	ANKRD20A3
254	ANKRD22
255	ANKRD23
256	ANKRD26
257	ANKRD27
258	ANKRD33B
259	ANKRD34A
260	ANKRD35
261	ANKRD36
262	ANKRD36B
263	ANKRD43
264	ANKRD50
265	ANKRD52
266	ANKRD54
267	ANKRD56
268	ANKRD57
269	ANKRD6
270	ANKRD9
271	ANKS1A
272	ANKS3
273	ANKS6
274	ANLN
275	ANO1
276	ANO10
277	ANO3
278	ANO4
279	ANO6
280	ANO7
281	ANO8
282	ANO9
283	ANTXR2
284	ANTXRL
285	ANXA11
286	ANXA2
287	ANXA2P1
288	ANXA2P2
289	ANXA2P3
290	ANXA3
291	ANXA8
292	ANXA8L1
293	ANXA8L2
294	AP3B1
295	AP3S2
296	APBA1
297	APBA2
298	APBA3
299	APBB2
300	APC2
301	APCDD1L
302	APEX1
303	APITD1
304	APLNR
305	APLP1
306	APOA2
307	APOA5
308	APOB
309	APOBEC3D
310	APOD
311	APOE
312	APOF
313	APP
314	APPBP2
315	APPL2
316	APRT
317	AQP5
318	ARAF
319	ARAP1
320	ARAP2
321	ARAP3
322	ARC
323	ARF6
324	ARFGAP1
325	ARFGAP3
326	ARFIP1
327	ARHGAP1
328	ARHGAP10
329	ARHGAP11A
330	ARHGAP12
331	ARHGAP17
332	ARHGAP20
333	ARHGAP21
334	ARHGAP22
335	ARHGAP23
336	ARHGAP29
337	ARHGAP31
338	ARHGAP32
339	ARHGAP39
340	ARHGAP4
341	ARHGAP40
342	ARHGAP42
343	ARHGAP5
344	ARHGDIA
345	ARHGEF1
346	ARHGEF10L
347	ARHGEF12
348	ARHGEF15
349	ARHGEF16
350	ARHGEF17
351	ARHGEF18
352	ARHGEF3
353	ARHGEF35
354	ARHGEF37
355	ARHGEF38
356	ARHGEF5
357	ARHGEF7
358	ARHGEF9
359	ARID1A
360	ARID1B
361	ARID3B
362	ARID3C
363	ARID4B
364	ARID5B
365	ARIH1
366	ARIH2
367	ARL17A
368	ARL4C
369	ARL5C
370	ARL8B
371	ARMC4
372	ARMC5
373	ARMC8
374	ARMC9
375	ARMCX4
376	ARNT2
377	ARPM1
378	ARPP19
379	ARRB2
380	ARRDC4
381	ARSD
382	ARSI
383	ARVCF
384	AS3MT
385	ASAP1
386	ASB1
387	ASB11
388	ASB13
389	ASB16
390	ASB6
391	ASB9
392	ASCC1
393	ASCC2
394	ASCL1
395	ASCL2
396	ASGR1
397	ASH1L
398	ASNS
399	ASPH
400	ASPRV1
401	ASTN1
402	ASTN2
403	ASXL1
404	ASXL3
405	ATAD2
406	ATAD2B
407	ATAD3C
408	ATCAY
409	ATF3
410	ATF4
411	ATF7IP
412	ATG2A
413	ATG2B
414	ATG4A
415	ATG9A
416	ATG9B
417	ATHL1
418	ATIC
419	ATL2
420	ATN1
421	ATOH8
422	ATP10A
423	ATP10B
424	ATP11A
425	ATP11B
426	ATP13A1
427	ATP1A1
428	ATP1A3
429	ATP1B1
430	ATP1B3
431	ATP2A2
432	ATP2B2
433	ATP2B3
434	ATP2B4
435	ATP5B
436	ATP5G3
437	ATP6AP2
438	ATP6V0A2
439	ATP6V0C
440	ATP6V0D2
441	ATP6V0E2
442	ATP6V1A
443	ATP6V1C2
444	ATP7A
445	ATP8A1
446	ATP8B3
447	ATP8B5P
448	ATP9A
449	ATPIF1
450	ATRIP
451	ATRN
452	ATRNL1
453	ATXN1
454	ATXN1L
455	ATXN2L
456	ATXN7
457	ATXN7L1
458	ATXN7L2
459	ATXN7L3B
460	AUH
461	AURKA
462	AUTS2
463	AVPI1
464	AVPR2
465	AXL
466	AZGP1
467	B3GALT6
468	B3GALTL
469	B3GNT1
470	B3GNT2
471	B3GNT4
472	B3GNT6
473	B3GNT7
474	B3GNT8
475	B3GNT9
476	B4GALNT1
477	B4GALNT2
478	B4GALNT4
479	B4GALT1
480	B4GALT4
481	BACE1
482	BACH1
483	BACH2
484	BAG1
485	BAG3
486	BAHCC1
487	BAHD1
488	BAI1
489	BAI2
490	BAIAP2L1
491	BAIAP2L2
492	BAMBI
493	BARHL1
494	BARX2
495	BASP1
496	BAZ1B
497	BAZ2A
498	BBS1
499	BBS2
500	BBS4
501	BBX
502	BCAM
503	BCAN
504	BCAP29
505	BCAS1
506	BCL10
507	BCL11A
508	BCL11B
509	BCL2
510	BCL2L1
511	BCL2L10
512	BCL2L11
513	BCL6B
514	BCL7B
515	BCL7C
516	BCL9
517	BCL9L
518	BCMO1
519	BCORL1
520	BCR
521	BDH1
522	BEGAIN
523	BEND4
524	BEND6
525	BEST1
526	BEX4
527	BFAR
528	BHLHE22
529	BHLHE41
530	BHMT
531	BICC1
532	BICD1
533	BICD2
534	BIN1
535	BIN3
536	BIRC6
537	BLK
538	BLM
539	BLNK
540	BLOC1S3
541	BLVRB
542	BMF
543	BMI1
544	BMP2K
545	BMP8A
546	BMP8B
547	BMPR1B
548	BMPR2
549	BNIP3
550	BNIP3L
551	BNIPL
552	BOD1L
553	BOD1P
554	BOK
555	BOLA2
556	BOLA2B
557	BOP1
558	BPGM
559	BPHL
560	BPIL2
561	BPTF
562	BRAP
563	BRCA1
564	BRCA2
565	BRD1
566	BRD2
567	BRD3
568	BRD4
569	BRD8
570	BRF1
571	BRI3
572	BRPF1
573	BRSK2
574	BRWD1
575	BSN
576	BSPRY
577	BTBD1
578	BTBD11
579	BTBD3
580	BTBD7
581	BTBD9
582	BTG2
583	BTN1A1
584	BUB1
585	BUB3
586	BZRAP1
587	BZW1
588	BZW2
589	C10orf105
590	C10orf108
591	C10orf111
592	C10orf114
593	C10orf118
594	C10orf12
595	C10orf137
596	C10orf140
597	C10orf26
598	C10orf27
599	C10orf46
600	C10orf54
601	C10orf88
602	C11orf41
603	C11orf42
604	C11orf45
605	C11orf57
606	C11orf61
607	C11orf80
608	C11orf87
609	C11orf9
610	C11orf95
611	C12orf12
612	C12orf35
613	C12orf36
614	C12orf41
615	C12orf42
616	C12orf44
617	C12orf47
618	C12orf49
619	C12orf5
620	C12orf50
621	C12orf51
622	C12orf54
623	C12orf66
624	C12orf67
625	C12orf75
626	C13orf1
627	C13orf16
628	C13orf23
629	C14orf104
630	C14orf126
631	C14orf132
632	C14orf135
633	C14orf176
634	C14orf178
635	C14orf179
636	C14orf43
637	C14orf50
638	C14orf80
639	C15orf2
640	C15orf27
641	C15orf28
642	C15orf37
643	C15orf39
644	C15orf41
645	C15orf42
646	C15orf52
647	C15orf61
648	C15orf62
649	C16orf11
650	C16orf13
651	C16orf5
652	C16orf52
653	C16orf53
654	C16orf54
655	C16orf58
656	C16orf62
657	C16orf70
658	C16orf72
659	C16orf79
660	C16orf82
661	C16orf88
662	C16orf93
663	C17orf101
664	C17orf103
665	C17orf107
666	C17orf44
667	C17orf51
668	C17orf55
669	C17orf57
670	C17orf59
671	C17orf60
672	C17orf62
673	C17orf69
674	C17orf70
675	C17orf72
676	C17orf74
677	C17orf82
678	C17orf88
679	C17orf91
680	C17orf96
681	C18orf1
682	C18orf25
683	C18orf32
684	C19orf24
685	C19orf45
686	C19orf48
687	C19orf51
688	C19orf52
689	C19orf55
690	C1orf106
691	C1orf115
692	C1orf116
693	C1orf126
694	C1orf144
695	C1orf150
696	C1orf159
697	C1orf172
698	C1orf173
699	C1orf183
700	C1orf190
701	C1orf198
702	C1orf204
703	C1orf21
704	C1orf213
705	C1orf229
706	C1orf27
707	C1orf43
708	C1orf49
709	C1orf63
710	C1orf65
711	C1orf93
712	C1QL1
713	C1QL2
714	C1QL4
715	C1QTNF4
716	C1QTNF6
717	C1QTNF8
718	C1QTNF9B
719	C1R
720	C1RL
721	C1S
722	C20orf111
723	C20orf112
724	C20orf132
725	C20orf141
726	C20orf165
727	C20orf201
728	C20orf203
729	C20orf24
730	C20orf29
731	C20orf96
732	C21orf125
733	C21orf128
734	C21orf130
735	C21orf2
736	C21orf56
737	C21orf58
738	C21orf62
739	C21orf67
740	C21orf70
741	C21orf81
742	C21orf90
743	C21orf91
744	C22orf29
745	C22orf31
746	C22orf40
747	C22orf45
748	C2CD2
749	C2CD2L
750	C2CD4B
751	C2CD4C
752	C2CD4D
753	C2orf16
754	C2orf18
755	C2orf29
756	C2orf54
757	C2orf55
758	C2orf62
759	C2orf67
760	C2orf68
761	C2orf71
762	C2orf72
763	C2orf81
764	C2orf83
765	C2orf85
766	C3orf16
767	C3orf18
768	C3orf19
769	C3orf21
770	C3orf36
771	C3orf38
772	C3orf42
773	C3orf54
774	C3orf58
775	C3orf63
776	C3orf70
777	C3orf74
778	C4A
779	C4B
780	C4orf19
781	C4orf32
782	C4orf38
783	C4orf41
784	C4orf42
785	C4orf44
786	C5orf13
787	C5orf24
788	C5orf30
789	C5orf33
790	C5orf35
791	C5orf39
792	C5orf51
793	C5orf53
794	C5orf60
795	C5orf62
796	C6orf106
797	C6orf124
798	C6orf127
799	C6orf132
800	C6orf136
801	C6orf145
802	C6orf146
803	C6orf154
804	C6orf162
805	C6orf168
806	C6orf174
807	C6orf186
808	C6orf195
809	C6orf201
810	C6orf204
811	C6orf208
812	C6orf223
813	C6orf227
814	C6orf35
815	C6orf47
816	C7orf29
817	C7orf30
818	C7orf34
819	C7orf41
820	C7orf49
821	C7orf52
822	C7orf53
823	C7orf58
824	C7orf65
825	C7orf70
826	C8orf40
827	C8orf42
828	C8orf44
829	C8orf55
830	C8orf58
831	C8orf73
832	C8orf77
833	C8orf80
834	C8orf84
835	C9orf100
836	C9orf102
837	C9orf114
838	C9orf119
839	C9orf123
840	C9orf130
841	C9orf131
842	C9orf142
843	C9orf144
844	C9orf144B
845	C9orf150
846	C9orf163
847	C9orf167
848	C9orf169
849	C9orf171
850	C9orf172
851	C9orf173
852	C9orf25
853	C9orf3
854	C9orf40
855	C9orf44
856	C9orf47
857	C9orf5
858	C9orf53
859	C9orf69
860	C9orf79
861	C9orf86
862	C9orf91
863	CA11
864	CA14
865	CA2
866	CA5A
867	CA6
868	CABIN1
869	CABLES1
870	CABLES2
871	CABP1
872	CABP2
873	CABP4
874	CACHD1
875	CACNA1A
876	CACNA1B
877	CACNA1C
878	CACNA1E
879	CACNA1F
880	CACNA1G
881	CACNA1H
882	CACNA1I
883	CACNA2D2
884	CACNB3
885	CACNG4
886	CACNG8
887	CADM4
888	CADPS
889	CADPS2
890	CALM1
891	CALM3
892	CALML3
893	CALML4
894	CALML5
895	CALN1
896	CAMK1D
897	CAMK2A
898	CAMK2N1
899	CAMK2N2
900	CAMKK1
901	CAMKV
902	CAMSAP1
903	CAMSAP1L1
904	CAMTA1
905	CAND1
906	CANT1
907	CAP1
908	CAPN1
909	CAPN10
910	CAPN11
911	CAPN12
912	CAPN3
913	CAPN6
914	CAPN7
915	CAPN9
916	CAPRIN1
917	CAPZA1
918	CAPZB
919	CARD10
920	CARD11
921	CARD14
922	CASC4
923	CASC5
924	CASK
925	CASKIN2
926	CASP4
927	CASP8
928	CASP8AP2
929	CASR
930	CAST
931	CASZ1
932	CATSPER1
933	CATSPER2P1
934	CAV2
935	CBFA2T2
936	CBFA2T3
937	CBFB
938	CBL
939	CBLC
940	CBLN2
941	CBR4
942	CBX2
943	CBX5
944	CBX6
945	CBX7
946	CBX8
947	CBY1
948	CC2D1A
949	CC2D1B
950	CCBL1
951	CCDC111
952	CCDC116
953	CCDC123
954	CCDC124
955	CCDC127
956	CCDC13
957	CCDC136
958	CCDC142
959	CCDC144C
960	CCDC149
961	CCDC150
962	CCDC151
963	CCDC155
964	CCDC157
965	CCDC163P
966	CCDC28B
967	CCDC3
968	CCDC37
969	CCDC40
970	CCDC41
971	CCDC43
972	CCDC45
973	CCDC57
974	CCDC64
975	CCDC64B
976	CCDC69
977	CCDC74B
978	CCDC82
979	CCDC85A
980	CCDC85B
981	CCDC85C
982	CCDC86
983	CCDC87
984	CCDC88A
985	CCDC88B
986	CCDC88C
987	CCDC93
988	CCDC96
989	CCHCR1
990	CCL27
991	CCM2
992	CCND1
993	CCND2
994	CCND3
995	CCNF
996	CCNG1
997	CCNI
998	CCNI2
999	CCNJL
1000	CCNL1
1001	CCNL2
1002	CCNY
1003	CCNYL1
1004	CCR2
1005	CCR5
1006	CCR7
1007	CCT3
1008	CCT5
1009	CCT6A
1010	CD109
1011	CD14
1012	CD164
1013	CD1D
1014	CD209
1015	CD24
1016	CD248
1017	CD274
1018	CD300A
1019	CD34
1020	CD3D
1021	CD44
1022	CD5
1023	CD58
1024	CD59
1025	CD5L
1026	CD6
1027	CD74
1028	CD8A
1029	CD9
1030	CD93
1031	CD97
1032	CD99
1033	CD99L2
1034	CDADC1
1035	CDC14A
1036	CDC16
1037	CDC34
1038	CDC37
1039	CDC42BPB
1040	CDC42EP1
1041	CDC42EP4
1042	CDC42SE1
1043	CDC6
1044	CDC7
1045	CDCA7
1046	CDCA7L
1047	CDH13
1048	CDH19
1049	CDH2
1050	CDH23
1051	CDH24
1052	CDH26
1053	CDHR1
1054	CDHR5
1055	CDK12
1056	CDK13
1057	CDK18
1058	CDK2AP1
1059	CDK2AP2
1060	CDK5R1
1061	CDK5R2
1062	CDK6
1063	CDKN1A
1064	CDKN1C
1065	CDKN2A
1066	CDON
1067	CDR1
1068	CDR2L
1069	CDRT15P
1070	CDS1
1071	CDSN
1072	CDT1
1073	CDX1
1074	CDY1
1075	CDY1B
1076	CDY2A
1077	CDY2B
1078	CDYL
1079	CDYL2
1080	CEACAM21
1081	CEACAM22P
1082	CEACAM5
1083	CEBPA
1084	CEBPB
1085	CEBPD
1086	CEBPG
1087	CECR6
1088	CECR7
1089	CEL
1090	CELA2A
1091	CELA2B
1092	CELF1
1093	CELF5
1094	CELF6
1095	CELP
1096	CELSR1
1097	CELSR2
1098	CELSR3
1099	CEND1
1100	CENPA
1101	CENPB
1102	CENPBD1
1103	CENPF
1104	CENPT
1105	CENPV
1106	CEP164
1107	CEP192
1108	CEP290
1109	CERK
1110	CERKL
1111	CES2
1112	CFD
1113	CFTR
1114	CGGBP1
1115	CGNL1
1116	CHAC1
1117	CHADL
1118	CHAF1A
1119	CHAT
1120	CHCHD2
1121	CHD2
1122	CHD5
1123	CHD6
1124	CHD7
1125	CHD8
1126	CHDH
1127	CHEK1
1128	CHERP
1129	CHGA
1130	CHKA
1131	CHKB
1132	CHKB-CPT1B
1133	CHML
1134	CHMP2A
1135	CHMP4B
1136	CHMP6
1137	CHMP7
1138	CHP
1139	CHPF2
1140	CHRDL2
1141	CHRFAM7A
1142	CHRM1
1143	CHRM5
1144	CHRNA10
1145	CHRNB1
1146	CHRNB2
1147	CHRNG
1148	CHST1
1149	CHST11
1150	CHST12
1151	CHST13
1152	CHST14
1153	CHST2
1154	CHST3
1155	CHST5
1156	CHST6
1157	CHST7
1158	CHST8
1159	CHSY3
1160	CHTF18
1161	CHTF8
1162	CIB1
1163	CIC
1164	CIDEA
1165	CILP2
1166	CIRBP
1167	CIT
1168	CITED1
1169	CITED2
1170	CITED4
1171	CKAP2L
1172	CKAP4
1173	CKB
1174	CLASP1
1175	CLASP2
1176	CLCN4
1177	CLCN5
1178	CLCN6
1179	CLCN7
1180	CLDN1
1181	CLDN11
1182	CLDN12
1183	CLDN14
1184	CLDN18
1185	CLDN19
1186	CLDN2
1187	CLDN3
1188	CLDN4
1189	CLDN7
1190	CLDN9
1191	CLEC11A
1192	CLEC16A
1193	CLEC1A
1194	CLEC2D
1195	CLEC2L
1196	CLIC1
1197	CLIC3
1198	CLIP1
1199	CLIP3
1200	CLK1
1201	CLK2
1202	CLK3
1203	CLK4
1204	CLMN
1205	CLN8
1206	CLOCK
1207	CLPTM1
1208	CLPX
1209	CLSPN
1210	CLSTN3
1211	CLTA
1212	CLTB
1213	CLTC
1214	CLU
1215	CLUAP1
1216	CLYBL
1217	CMA1
1218	CMAS
1219	CMBL
1220	CMIP
1221	CMTM1
1222	CMTM4
1223	CMTM6
1224	CMYA5
1225	CNBP
1226	CNDP2
1227	CNFN
1228	CNGA3
1229	CNIH2
1230	CNKSR2
1231	CNN2
1232	CNNM1
1233	CNNM2
1234	CNNM3
1235	CNO
1236	CNOT3
1237	CNOT4
1238	CNOT6L
1239	CNOT8
1240	CNP
1241	CNPY3
1242	CNR1
1243	CNST
1244	CNTD2
1245	CNTLN
1246	CNTNAP1
1247	CNTNAP3
1248	CNTNAP5
1249	COBRA1
1250	COG3
1251	COL11A1
1252	COL12A1
1253	COL14A1
1254	COL15A1
1255	COL16A1
1256	COL17A1
1257	COL18A1
1258	COL1A1
1259	COL22A1
1260	COL23A1
1261	COL4A2
1262	COL4A3
1263	COL4A3BP
1264	COL5A2
1265	COL5A3
1266	COL6A1
1267	COL6A3
1268	COL6A4P2
1269	COL7A1
1270	COL9A1
1271	COL9A2
1272	COMMD1
1273	COMMD2
1274	COMMD7
1275	COMMD9
1276	COMTD1
1277	COPA
1278	COPS2
1279	COPS7B
1280	COQ5
1281	CORO1A
1282	CORO1B
1283	CORO1C
1284	CORO2A
1285	CORO6
1286	CORO7
1287	COX19
1288	COX4NB
1289	CP110
1290	CPA2
1291	CPA4
1292	CPD
1293	CPEB2
1294	CPEB4
1295	CPLX1
1296	CPNE4
1297	CPSF1
1298	CPSF7
1299	CPT1A
1300	CPT2
1301	CPXM2
1302	CPZ
1303	CRABP2
1304	CRAMP1L
1305	CRAT
1306	CRB2
1307	CRCT1
1308	CREB3L2
1309	CREB3L3
1310	CREB5
1311	CREBBP
1312	CREG1
1313	CREG2
1314	CRELD1
1315	CRH
1316	CRIM1
1317	CRIP2
1318	CRISP3
1319	CRK
1320	CRKL
1321	CRLF1
1322	CRLF3
1323	CRNN
1324	CROCC
1325	CRP
1326	CRTAC1
1327	CRTC1
1328	CRTC2
1329	CRTC3
1330	CRYBB3
1331	CRYGC
1332	CRYL1
1333	CS
1334	CSDA
1335	CSDAP1
1336	CSDC2
1337	CSF1
1338	CSF2
1339	CSF2RA
1340	CSF2RB
1341	CSGALNACT1
1342	CSGALNACT2
1343	CSH2
1344	CSMD1
1345	CSMD2
1346	CSMD3
1347	CSNK1A1L
1348	CSNK1D
1349	CSNK1E
1350	CSNK2A2
1351	CSPG4
1352	CSPG5
1353	CSPP1
1354	CSRNP1
1355	CSRNP3
1356	CST5
1357	CST6
1358	CST7
1359	CSTF2T
1360	CT47A1
1361	CT47A10
1362	CT47A11
1363	CT47A2
1364	CT47A3
1365	CT47A4
1366	CT47A5
1367	CT47A6
1368	CT47A7
1369	CT47A8
1370	CT47A9
1371	CT62
1372	CTAGE1
1373	CTAGE4
1374	CTAGE9
1375	CTDP1
1376	CTDSP2
1377	CTDSPL2
1378	CTF1
1379	CTNNA2
1380	CTNNA3
1381	CTNNBIP1
1382	CTNNBL1
1383	CTNND1
1384	CTNND2
1385	CTNS
1386	CTPS
1387	CTPS2
1388	CTRB1
1389	CTRB2
1390	CTSB
1391	CTSE
1392	CTSF
1393	CTSL2
1394	CTSO
1395	CTSZ
1396	CTTN
1397	CTTNBP2
1398	CUBN
1399	CUEDC1
1400	CUL3
1401	CUL5
1402	CUL7
1403	CUL9
1404	CUX1
1405	CXADR
1406	CXADRP2
1407	CXCL12
1408	CXCL14
1409	CXCR2
1410	CXCR3
1411	CXorf40B
1412	CXorf49
1413	CXorf49B
1414	CXXC5
1415	CYB561D1
1416	CYB5R3
1417	CYB5R4
1418	CYBA
1419	CYGB
1420	CYHR1
1421	CYLD
1422	CYP1A2
1423	CYP1B1
1424	CYP20A1
1425	CYP26B1
1426	CYP26C1
1427	CYP27A1
1428	CYP27C1
1429	CYP2B7P1
1430	CYP2F1
1431	CYP2U1
1432	CYP46A1
1433	CYP4V2
1434	CYP7B1
1435	CYP8B1
1436	CYTH1
1437	CYTH2
1438	CYTH3
1439	CYTH4
1440	D4S234E
1441	DAAM1
1442	DACT1
1443	DACT2
1444	DACT3
1445	DAG1
1446	DAGLA
1447	DAGLB
1448	DAP
1449	DAP3
1450	DAPK2
1451	DAPK3
1452	DAZ2
1453	DAZ3
1454	DAZ4
1455	DAZAP1
1456	DBF4B
1457	DBH
1458	DBI
1459	DBN1
1460	DBNL
1461	DBP
1462	DBT
1463	DBX2
1464	DCAF10
1465	DCAF12L1
1466	DCAF12L2
1467	DCAF17
1468	DCAF4L1
1469	DCAF4L2
1470	DCAF5
1471	DCAF7
1472	DCDC2
1473	DCHS1
1474	DCHS2
1475	DCLK1
1476	DCLRE1C
1477	DCP1A
1478	DCTN1
1479	DCUN1D5
1480	DCX
1481	DDAH2
1482	DDHD1
1483	DDHD2
1484	DDI1
1485	DDIT4
1486	DDN
1487	DDOST
1488	DDX11L2
1489	DDX17
1490	DDX20
1491	DDX21
1492	DDX23
1493	DDX24
1494	DDX28
1495	DDX3X
1496	DDX42
1497	DDX54
1498	DEAF1
1499	DEDD2
1500	DEGS1
1501	DEGS2
1502	DENND1A
1503	DENND1C
1504	DENND2A
1505	DENND2D
1506	DENND3
1507	DENND4A
1508	DENND4B
1509	DENND5A
1510	DEPDC7
1511	DERL1
1512	DERL3
1513	DES
1514	DEXI
1515	DGAT1
1516	DGCR10
1517	DGCR2
1518	DGCR6
1519	DGCR6L
1520	DGCR9
1521	DGKB
1522	DGKD
1523	DGKH
1524	DGKI
1525	DGKQ
1526	DHCR24
1527	DHCR7
1528	DHH
1529	DHRS11
1530	DHRS12
1531	DHRS3
1532	DHRS9
1533	DHRSX
1534	DHX15
1535	DHX33
1536	DHX36
1537	DHX40
1538	DHX9
1539	DIABLO
1540	DICER1
1541	DIDO1
1542	DIO2
1543	DIO3OS
1544	DIP2A
1545	DIP2B
1546	DIP2C
1547	DIRAS1
1548	DIRAS2
1549	DIRC2
1550	DIRC3
1551	DIS3
1552	DISC1
1553	DISP2
1554	DKC1
1555	DKFZP434K028
1556	DKFZp434L192
1557	DKFZp686O24166
1558	DKFZp761E198
1559	DKK3
1560	DLAT
1561	DLEU1
1562	DLEU7
1563	DLG2
1564	DLG3
1565	DLG4
1566	DLG5
1567	DLGAP2
1568	DLGAP4
1569	DLX1
1570	DLX2
1571	DLX3
1572	DLX4
1573	DMBT1
1574	DMBX1
1575	DMD
1576	DMKN
1577	DMPK
1578	DMRT2
1579	DMRT3
1580	DMRTA1
1581	DMRTA2
1582	DMTF1
1583	DMXL1
1584	DMXL2
1585	DNA2
1586	DNAH11
1587	DNAH17
1588	DNAH3
1589	DNAH9
1590	DNAI2
1591	DNAJA1
1592	DNAJA4
1593	DNAJB1
1594	DNAJB12
1595	DNAJB2
1596	DNAJB5
1597	DNAJB6
1598	DNAJC13
1599	DNAJC18
1600	DNAJC2
1601	DNAJC21
1602	DNAJC25
1603	DNAJC25-GNG10
1604	DNAJC27
1605	DNAJC3
1606	DNAJC5B
1607	DNAJC6
1608	DNAL1
1609	DNASE1
1610	DNASE1L1
1611	DNASE1L2
1612	DNHD1
1613	DNLZ
1614	DNM1
1615	DNM1L
1616	DNM1P35
1617	DNMBP
1618	DNMT3A
1619	DNMT3B
1620	DOCK1
1621	DOCK3
1622	DOCK5
1623	DOK1
1624	DOK4
1625	DOK6
1626	DOPEY1
1627	DOPEY2
1628	DOT1L
1629	DPEP1
1630	DPEP2
1631	DPEP3
1632	DPF1
1633	DPH2
1634	DPP8
1635	DPP9
1636	DPY19L2
1637	DPY19L3
1638	DPYSL2
1639	DPYSL3
1640	DPYSL5
1641	DRAM1
1642	DRD2
1643	DRD5
1644	DRG2
1645	DRP2
1646	DSC3
1647	DSCAML1
1648	DSE
1649	DSEL
1650	DSG1
1651	DSG3
1652	DSP
1653	DST
1654	DSTYK
1655	DTNA
1656	DTNBP1
1657	DUOXA1
1658	DUS1L
1659	DUSP10
1660	DUSP14
1661	DUSP15
1662	DUSP16
1663	DUSP2
1664	DUSP3
1665	DUSP5
1666	DUSP7
1667	DUSP8
1668	DUT
1669	DUX4
1670	DVL1
1671	DVL2
1672	DVL3
1673	DYNC1H1
1674	DYNC1I1
1675	DYNC1LI2
1676	DYNLRB1
1677	DYRK2
1678	DYSF
1679	DYTN
1680	DZIP1
1681	E2F1
1682	E2F2
1683	E2F5
1684	E2F6
1685	E2F7
1686	EAF1
1687	EBF4
1688	EBI3
1689	EBNA1BP2
1690	EBP
1691	ECE2
1692	ECEL1
1693	EDA
1694	EDAR
1695	EDARADD
1696	EDC3
1697	EDEM1
1698	EDEM3
1699	EEA1
1700	EEF1A1
1701	EEF1A1P9
1702	EEF1D
1703	EEF1G
1704	EEF2
1705	EFCAB4A
1706	EFHC2
1707	EFHD1
1708	EFHD2
1709	EFNA3
1710	EFNA5
1711	EFNB1
1712	EFNB2
1713	EFR3B
1714	EFTUD2
1715	EGFL6
1716	EGFL8
1717	EGFLAM
1718	EGFR
1719	EGLN1
1720	EGLN3
1721	EGR1
1722	EGR2
1723	EGR3
1724	EGR4
1725	EHBP1L1
1726	EHD1
1727	EHD2
1728	EHD4
1729	EHF
1730	EI24
1731	EIF1
1732	EIF1AX
1733	EIF2AK3
1734	EIF2AK4
1735	EIF2C1
1736	EIF2S2
1737	EIF3A
1738	EIF3B
1739	EIF3C
1740	EIF3CL
1741	EIF3F
1742	EIF3H
1743	EIF4A1
1744	EIF4A3
1745	EIF4B
1746	EIF4E
1747	EIF4EBP2
1748	EIF4G1
1749	EIF4G2
1750	EIF4H
1751	EIF5
1752	EIF5A2
1753	EIF5AL1
1754	EIF6
1755	ELAVL2
1756	ELAVL3
1757	ELAVL4
1758	ELF4
1759	ELF5
1760	ELFN1
1761	ELFN2
1762	ELK1
1763	ELK4
1764	ELL
1765	ELL2
1766	ELMO2
1767	ELMOD3
1768	ELN
1769	ELOF1
1770	ELOVL3
1771	ELOVL4
1772	ELOVL5
1773	EMD
1774	EME2
1775	EMID2
1776	EMILIN3
1777	EML1
1778	EML4
1779	EML5
1780	EMP1
1781	EMP2
1782	EMR2
1783	EMX1
1784	EMX2
1785	EMX2OS
1786	EN1
1787	EN2
1788	ENAH
1789	ENAM
1790	ENDOD1
1791	ENGASE
1792	ENO1
1793	ENPP5
1794	ENSA
1795	ENTPD1
1796	ENTPD3
1797	ENTPD4
1798	ENTPD5
1799	ENTPD6
1800	ENTPD7
1801	EP300
1802	EP400
1803	EPB41L1
1804	EPB41L4B
1805	EPB41L5
1806	EPB49
1807	EPCAM
1808	EPHA10
1809	EPHA4
1810	EPHA8
1811	EPHB1
1812	EPHB4
1813	EPM2A
1814	EPM2AIP1
1815	EPN1
1816	EPN2
1817	EPN3
1818	EPOR
1819	EPPK1
1820	EPS15L1
1821	EPSTI1
1822	ERBB3
1823	ERBB4
1824	ERC1
1825	ERCC1
1826	ERCC2
1827	ERCC3
1828	ERCC8
1829	ERF
1830	ERI1
1831	ERI2
1832	ERI3
1833	ERICH1
1834	ERMP1
1835	ESPNL
1836	ESR1
1837	ESRP2
1838	ESYT1
1839	ESYT2
1840	ETFB
1841	ETNK1
1842	ETNK2
1843	ETS1
1844	ETV1
1845	ETV3
1846	ETV3L
1847	ETV5
1848	ETV6
1849	EVC
1850	EVC2
1851	EVI5L
1852	EVPL
1853	EVPLL
1854	EVX1
1855	EVX2
1856	EXD3
1857	EXOC3
1858	EXOC3L2
1859	EXOC7
1860	EXOC8
1861	EXOSC6
1862	EXPH5
1863	EXT1
1864	EXTL2
1865	EXTL3
1866	EYA4
1867	EZR
1868	F2RL3
1869	F3
1870	F8
1871	F8A1
1872	F9
1873	FAAH
1874	FADS2
1875	FAF1
1876	FAIM2
1877	FAM100B
1878	FAM101B
1879	FAM102A
1880	FAM104A
1881	FAM105A
1882	FAM105B
1883	FAM107B
1884	FAM108A1
1885	FAM108B1
1886	FAM109A
1887	FAM109B
1888	FAM110A
1889	FAM110B
1890	FAM113B
1891	FAM114A1
1892	FAM117A
1893	FAM117B
1894	FAM118A
1895	FAM120AOS
1896	FAM122A
1897	FAM122C
1898	FAM123A
1899	FAM123B
1900	FAM123C
1901	FAM126A
1902	FAM126B
1903	FAM127A
1904	FAM127B
1905	FAM129B
1906	FAM134A
1907	FAM134C
1908	FAM13AOS
1909	FAM151A
1910	FAM155B
1911	FAM160A1
1912	FAM160B2
1913	FAM166A
1914	FAM167A
1915	FAM170A
1916	FAM171A2
1917	FAM172A
1918	FAM174B
1919	FAM175A
1920	FAM175B
1921	FAM177B
1922	FAM178A
1923	FAM179B
1924	FAM180B
1925	FAM181B
1926	FAM183B
1927	FAM184B
1928	FAM187B
1929	FAM188B
1930	FAM18B2
1931	FAM190A
1932	FAM190B
1933	FAM193A
1934	FAM193B
1935	FAM196A
1936	FAM196B
1937	FAM19A5
1938	FAM20A
1939	FAM20C
1940	FAM21A
1941	FAM21C
1942	FAM22D
1943	FAM22G
1944	FAM25A
1945	FAM25B
1946	FAM25C
1947	FAM25G
1948	FAM26D
1949	FAM26E
1950	FAM36A
1951	FAM38A
1952	FAM3C
1953	FAM41AY1
1954	FAM41AY2
1955	FAM41C
1956	FAM43A
1957	FAM43B
1958	FAM46A
1959	FAM46C
1960	FAM47A
1961	FAM47C
1962	FAM47E
1963	FAM48B1
1964	FAM50A
1965	FAM53B
1966	FAM55C
1967	FAM58B
1968	FAM59B
1969	FAM5C
1970	FAM63B
1971	FAM70A
1972	FAM70B
1973	FAM74A3
1974	FAM75A1
1975	FAM75A2
1976	FAM75A3
1977	FAM75A5
1978	FAM75A6
1979	FAM75A7
1980	FAM75C1
1981	FAM78A
1982	FAM78B
1983	FAM83E
1984	FAM83G
1985	FAM83H
1986	FAM84A
1987	FAM84B
1988	FAM86A
1989	FAM8A1
1990	FAM90A1
1991	FAM96B
1992	FAM98C
1993	FANCA
1994	FANCD2
1995	FANCG
1996	FAR1
1997	FARP1
1998	FASN
1999	FAT1
[truncated: 5,063 more rows]
